# Supplementary material for: Analysis of autophagy in DLBCL reveals subtype-specific differences and the preferential targeting of ULK1 inhibition in GCB-DLBCL provides a rationale as a new therapeutic approach
Source: PubMed Central journal article supplement (PMC10844068; doi:10.1038/s41375-024-02147-4), 2024-01-23
Supplement: 41375_2024_2147_MOESM2_ESM.pdf [file 41375_2024_2147_MOESM2_ESM.pdf]

**A)**

| Subtype            | Cytoplasmic staining (no. of cases) |      |          |      |
|--------------------|-------------------------------------|------|----------|------|
|                    | LC3B (n=)                           |      | p62 (n=) |      |
|                    | Low                                 | High | Low      | High |
| DLBCL, NOS (n=100) | 41                                  | 59   | 42       | 58   |
| FL (n=37)          | 13                                  | 24   | 25       | 12   |

**B)**

| Lymphoma Subtypes | Total no. of cases | No. of LC3B cases |      | Percentage of LC3B staining (%) |      |      |
|-------------------|--------------------|-------------------|------|---------------------------------|------|------|
|                   |                    | Low               | High | Low                             | High |      |
| Indolent          | CLL/SLL            | 37                | 26   | 11                              | 70.3 | 29.7 |
|                   | FL                 | 37                | 13   | 24                              | 35.1 | 64.9 |
|                   | MZL                | 28                | 25   | 3                               | 89.3 | 10.7 |
|                   | MCL                | 47                | 36   | 11                              | 76.6 | 23.4 |
| Aggressive        | BL                 | 16                | 5    | 11                              | 31.3 | 68.8 |
|                   | DLBCL, CNS         | 36                | 2    | 34                              | 5.6  | 94.4 |
|                   | DLBCL, NOS         | 100               | 41   | 59                              | 41   | 59   |
|                   | PMBL               | 9                 | 4    | 5                               | 44.4 | 55.6 |
|                   | HGB                | 8                 | 2    | 6                               | 25   | 75   |

**C)**

**Indolent vs. Aggressive lymphomas**

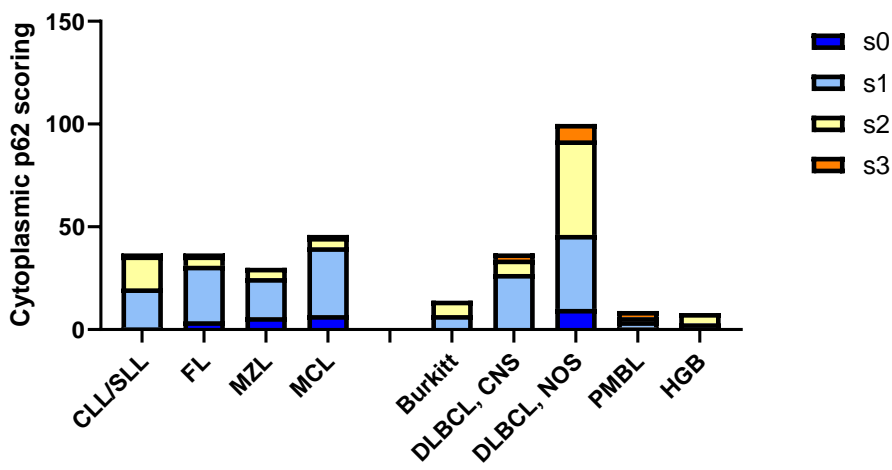

**D)**

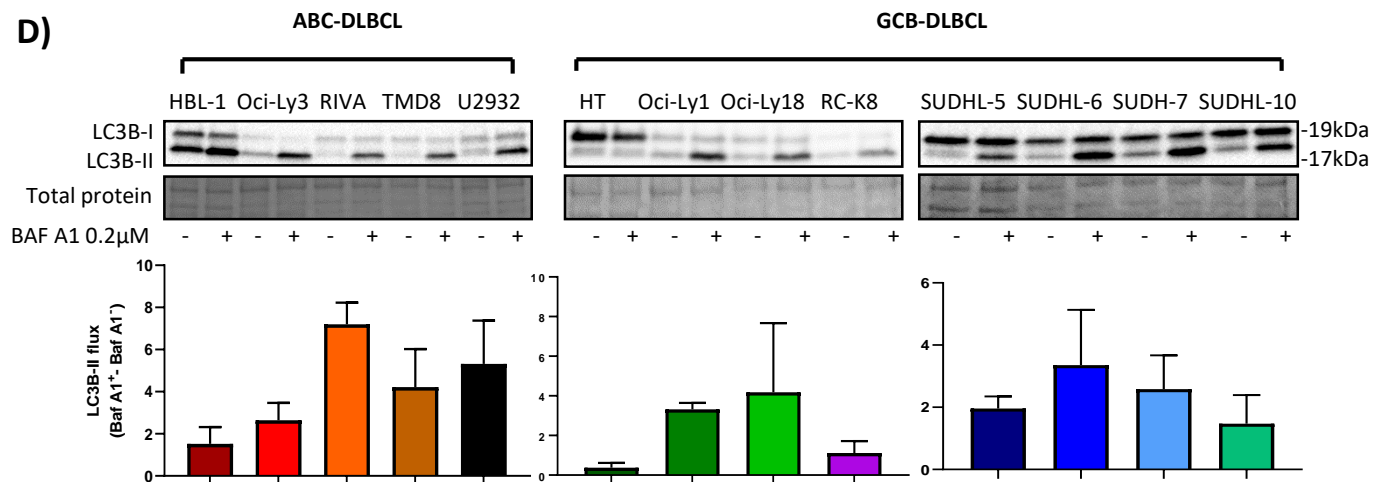

**E)**

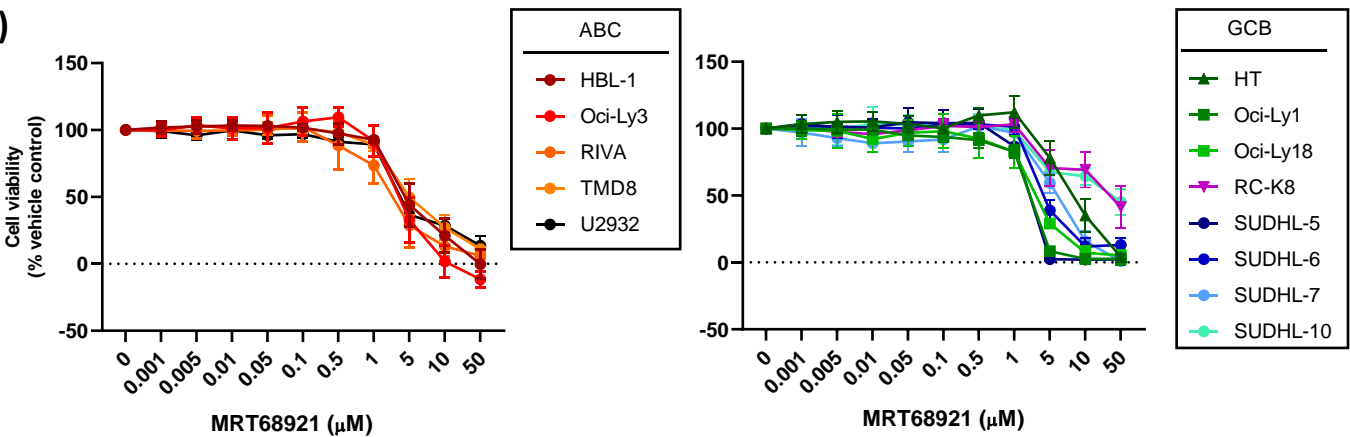

**Supplementary Figure 1**

**Supplementary figure 1:** Primary aggressive lymphomas exhibit increased LC3B cytoplasmic staining and DLBCL subtype cell lines exhibit deregulated autophagy. **A)** Total number of DLBCL, NOS and FL cases (no. of cases) staining positive for LC3B and p62 were tabled. **B)** 318 primary lymphoma cases were grouped according to their clinical classifications being indolent (n=149) and aggressive (n=169) lymphomas. Total number of B-cell lymphoma cases, LC3B high and low cases, and percentage of cytoplasmic LC3B staining was tabled. **C)** p62 staining on indolent and aggressive primary lymphoma biopsies. Scoring system of p62 staining intensity 0-3, score 0 lack of immunoreactivity, score 1 weak staining, score 2 intermediate dot-like staining and score 3 strong immunoreactivity in  $\geq 5\%$  of the cells. **D)** ABC and GCB cell lines were treated with Bafilomycin A1 (Baf A1, 0.2 $\mu$ M) for 2 h. Image J was used to quantify the bands and normalized to control- treated cells (BafA1<sup>+</sup>-BafA<sup>-</sup>). Total protein was used as a loading control. Representative blot from at least three independent experiments is shown. Plotted bar graphs represent mean  $\pm$  standard deviation (SD). **E)** DLBCL cell lines were treated with MRT68921 (at indicated concentrations) for 24 h. Cell viability was measured using PrestoBlue assay. Values were normalised to untreated (four independent experiments, mean $\pm$  SD).

Indolent Lymphoma: CLL: chronic lymphocytic leukaemia; SLL: small lymphocytic lymphoma; FL: follicular lymphoma; MZL: marginal zone lymphoma; MCL: mantle cell lymphoma; Aggressive lymphoma: BL: burkitt lymphoma; DLBCL, CNS: diffuse large B-cell lymphoma, central nervous system; DLBCL, NOS: diffuse large B-cell lymphoma, not otherwise specified; PMBL: primary mediastinal B-cell lymphoma; HGB: high-grade B-cell lymphoma.

**A)**

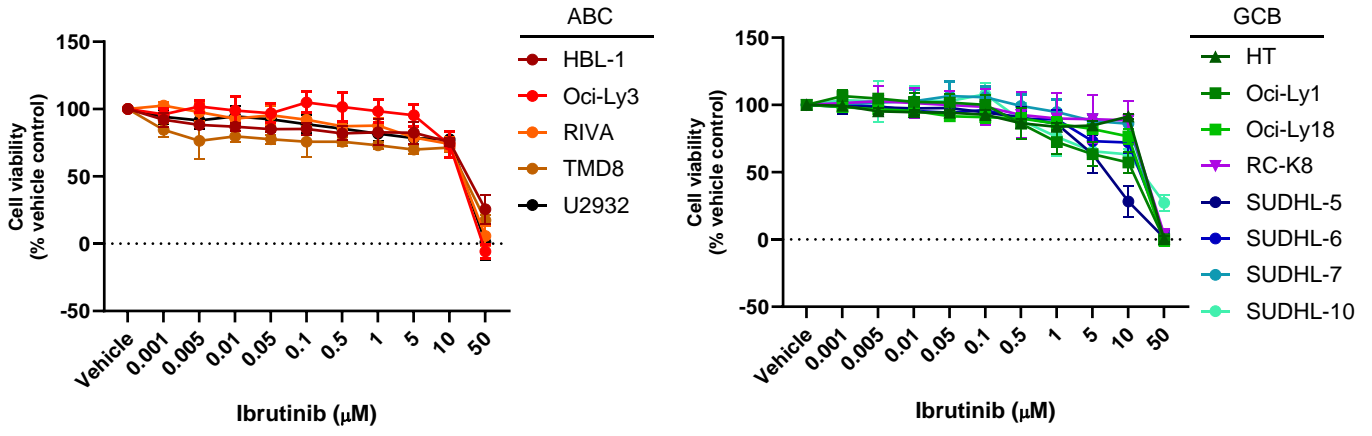

**B)**

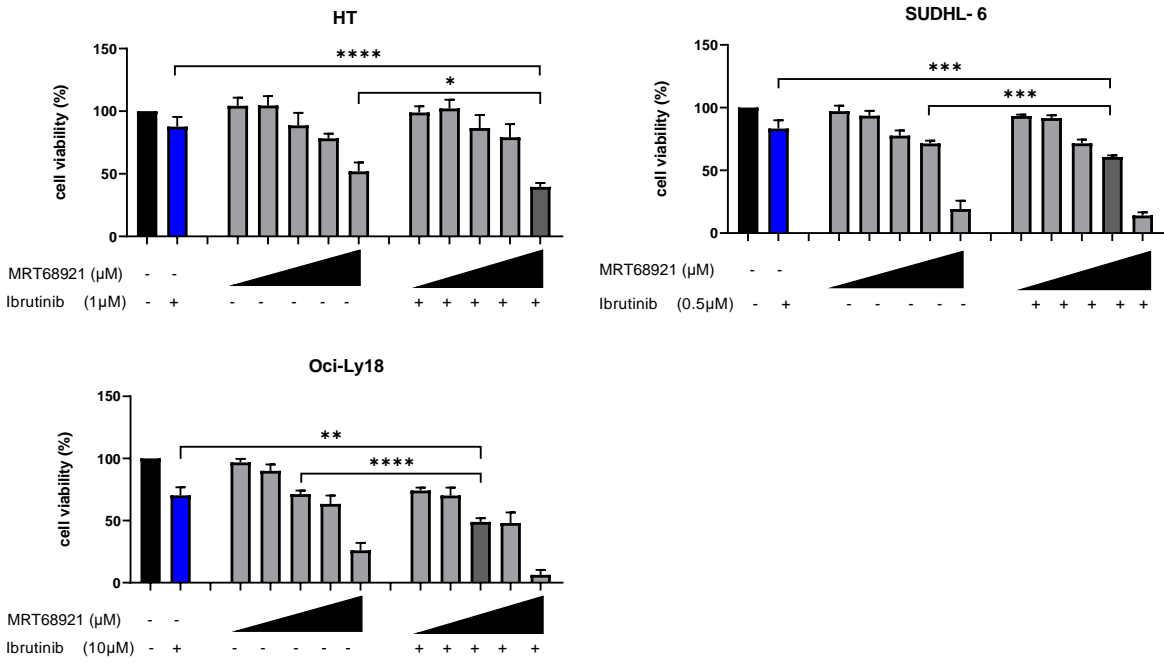

**C)**

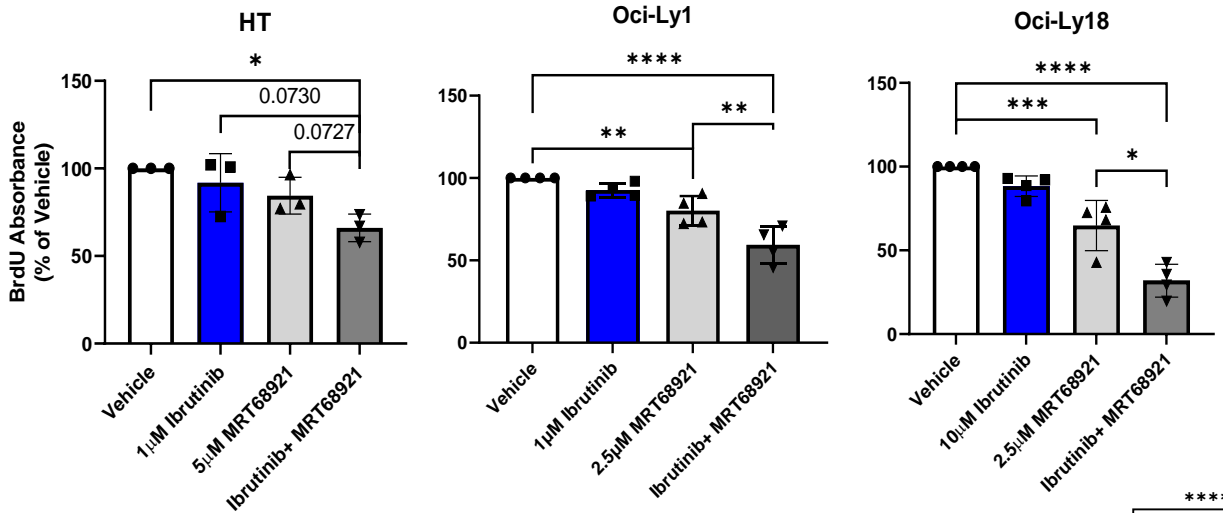

**D)**

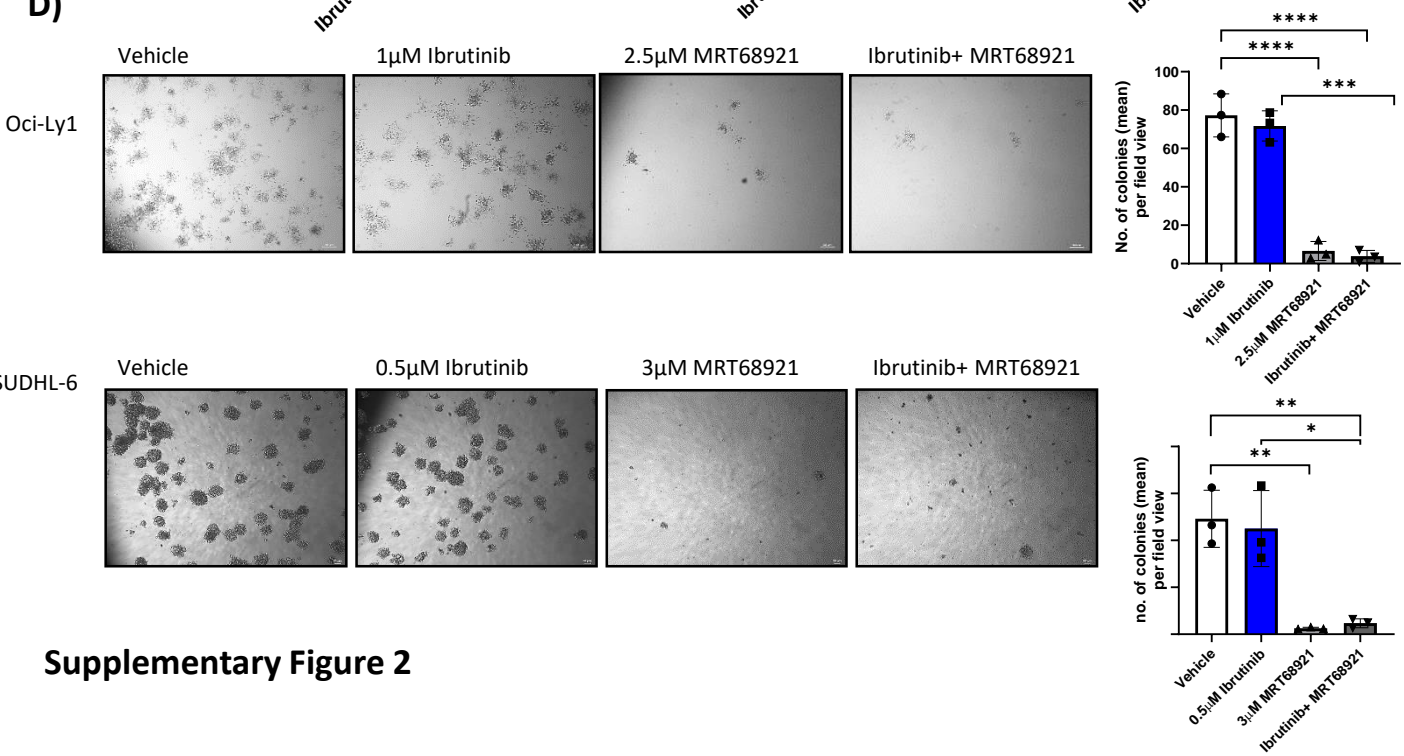

**Supplementary Figure 2**

**Supplementary figure 2:** Ibrutinib and MRT68921 cooperatively elicits anti-tumour activity *in vitro* in GCB-DLBCL cell lines. **A)** ABC and GCB cell lines were dosed with different concentrations of ibrutinib for 24 h. Cell viability using PrestoBlue was assessed (four independent experiments, error bars represent mean $\pm$  SD). **B)** GCB HT, SUDHL-6 and Oci-Ly18 cell lines were treated with vehicle, ibrutinib, ascending MRT68921 (0.5, 1, 2.5, 3 and 5  $\mu$ M) and in combination (concentrations as indicated) for 24 h, cellular viability was evaluated. **C)** To evaluate cell proliferation the incorporation of BrdU was measured in HT, Oci-Ly1 and Oci-Ly18 treated with ibrutinib  $\pm$  MRT68921 for 24hr. The SUDHL-6 cell line was not suitable for this assay. *P* values were calculated using one-way ANOVA and Dunnett's multiple comparisons test, and student *t* test between variables. The data is representative of at least three independent experiments and error bars of mean $\pm$  SD **D)** GCB cell lines were treated with ibrutinib  $\pm$  MRT68321 as indicated for 24 h. Cells were then collected and seeded in six well plates containing methylcellulose and incubated for 8 days. One-way ANOVA with post hoc Dunnett's multiple comparisons test was applied and Student *t* test unpaired two tailed test. The data is representative of at least three independent experiments and error bars of mean $\pm$  SD, \**P*<0.05, \*\**P*<0.01, \*\*\**P*<0.001, \*\*\*\**P*<0.0001.

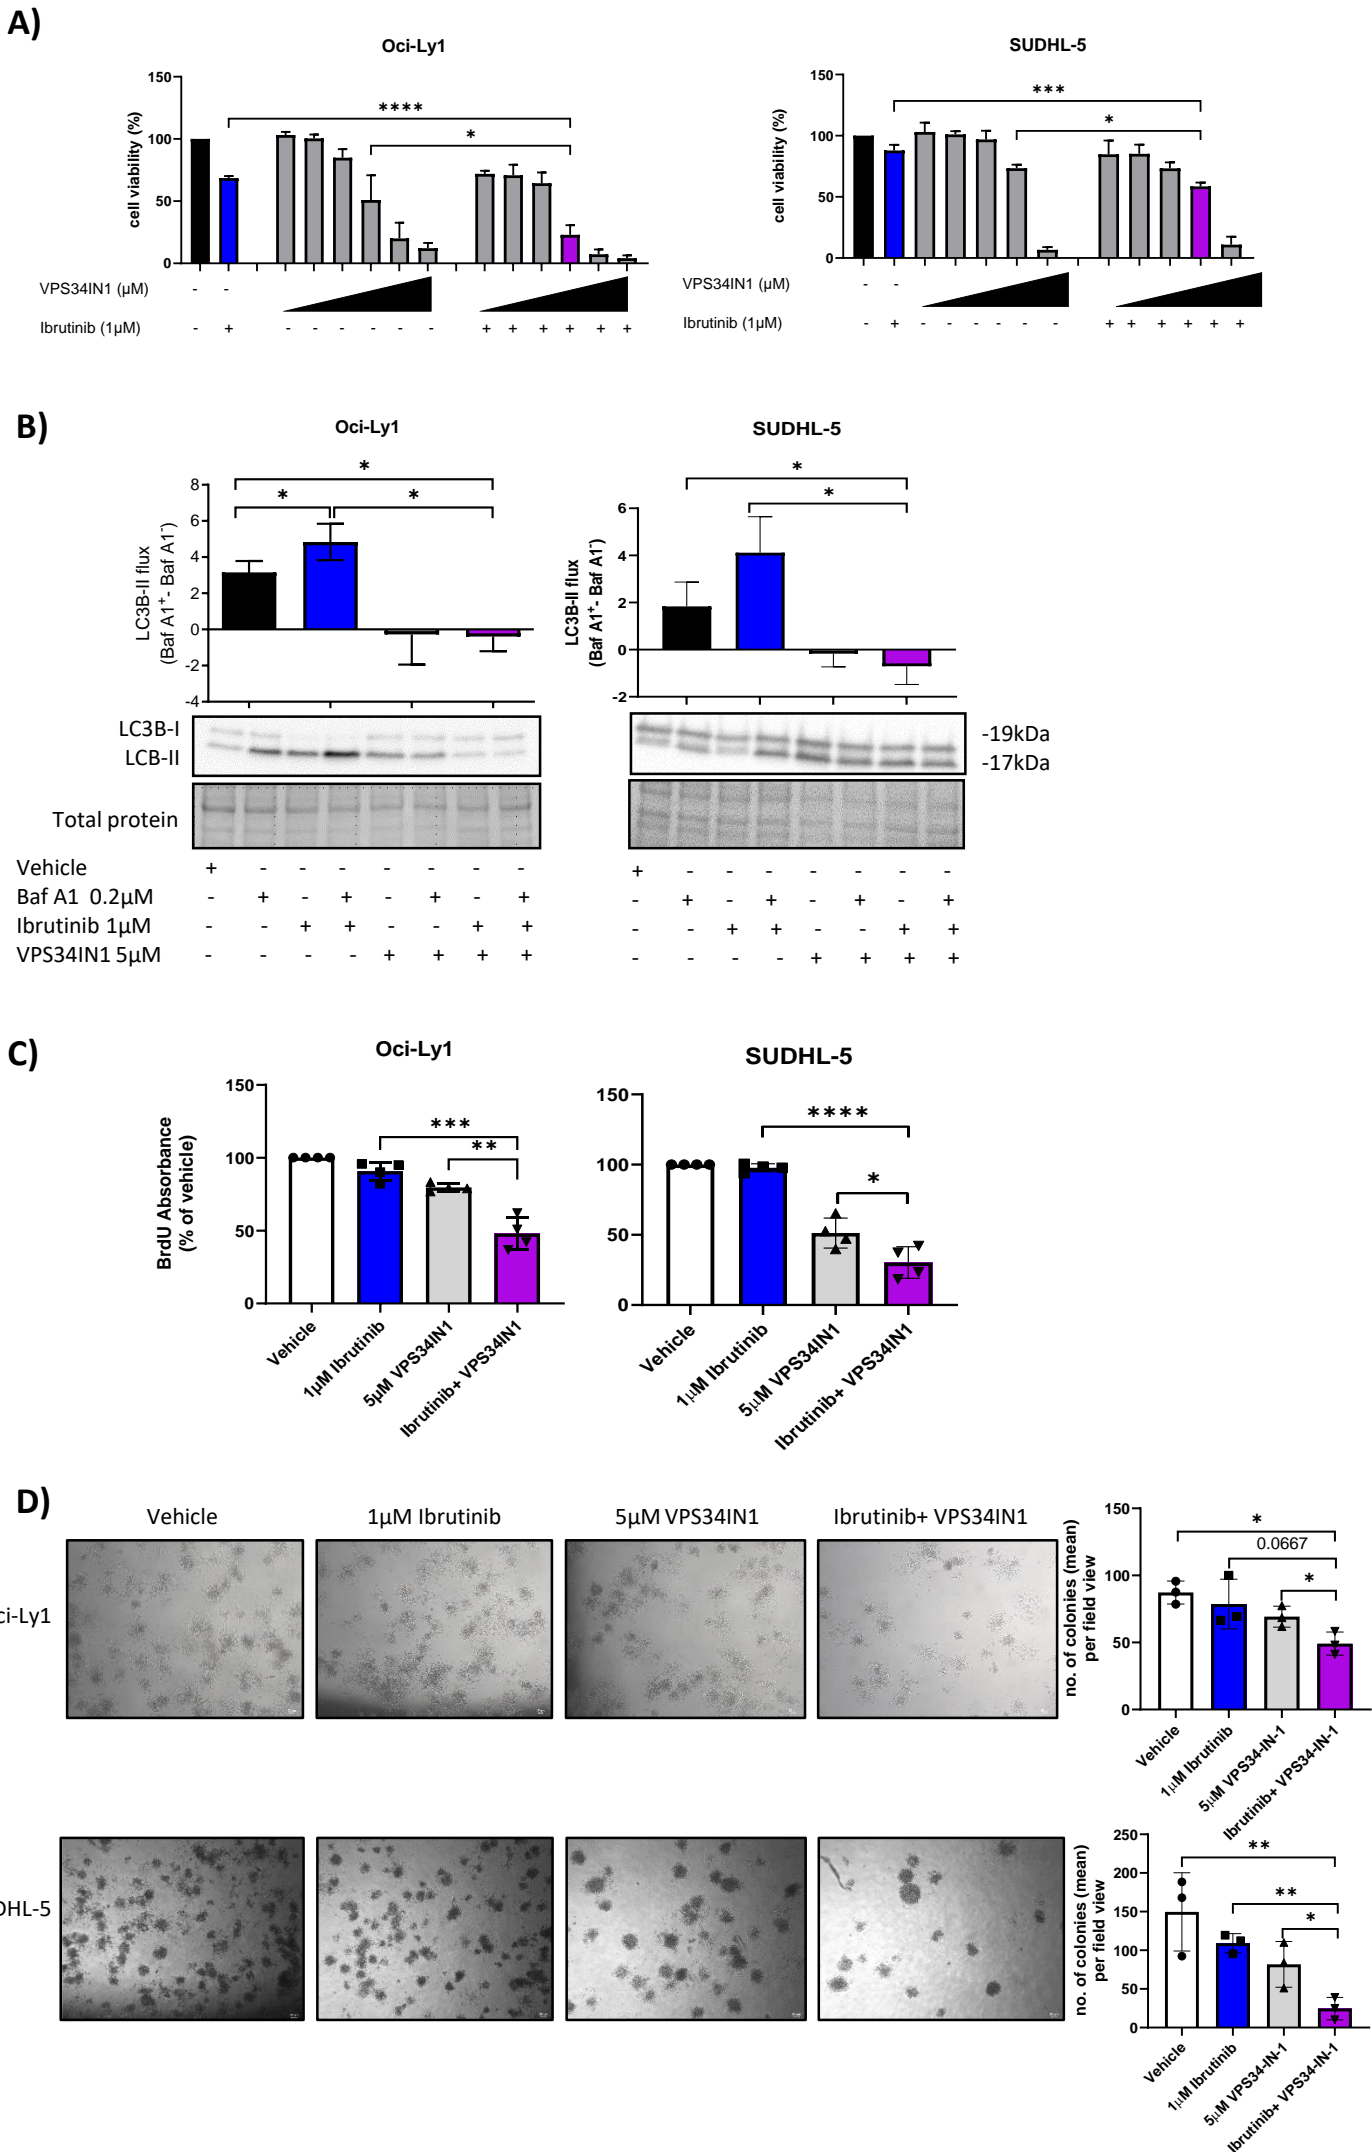

Supplementary Figure 3

**Supplementary figure 3:** VPS34 inhibition reduces autophagic flux and targets colony formation. **A)** To assess whether inhibition of the secondary autophagy initiation complex: VPS34 may sensitise the GCB Oci-Ly1 and SUDHL-5 cell lines to ibrutinib we titrated different concentrations of VPS34 inhibitor (VPS34IN1) (0.5, 1, 2.5, 5, 10  $\mu$ M) in the presence and absence of ibrutinib (1 $\mu$ M) and vehicle for 24 h. Cell viability was measured using PrestoBlue in four independent experiments. *P* values were calculated using one-way ANOVA and Dunnett's multiple comparisons test, and student t test between variables. **B)** Autophagic flux was measured. Quantification of LC3B turnover was determined using Mann-Whitney U test in four independent experiments. **C)** Effects of ibrutinib + VPS34IN1 24 h on proliferation was assessed using BrdU assay. Co-treatment of ibrutinib and VPS34IN1 significantly reduced cellular proliferation. **D)** Using the selected concentrations (as indicated) colony forming capacity was assessed. One-way ANOVA with post hoc Dunnett's multiple comparisons test was applied and also Student t test unpaired two tailed test. The data is representative of three independent experiments. Error bars correspond to the mean  $\pm$  SD, \**P*<0.05, \*\**P*<0.01, \*\*\**P*<0.001, \*\*\*\**P*<0.0001

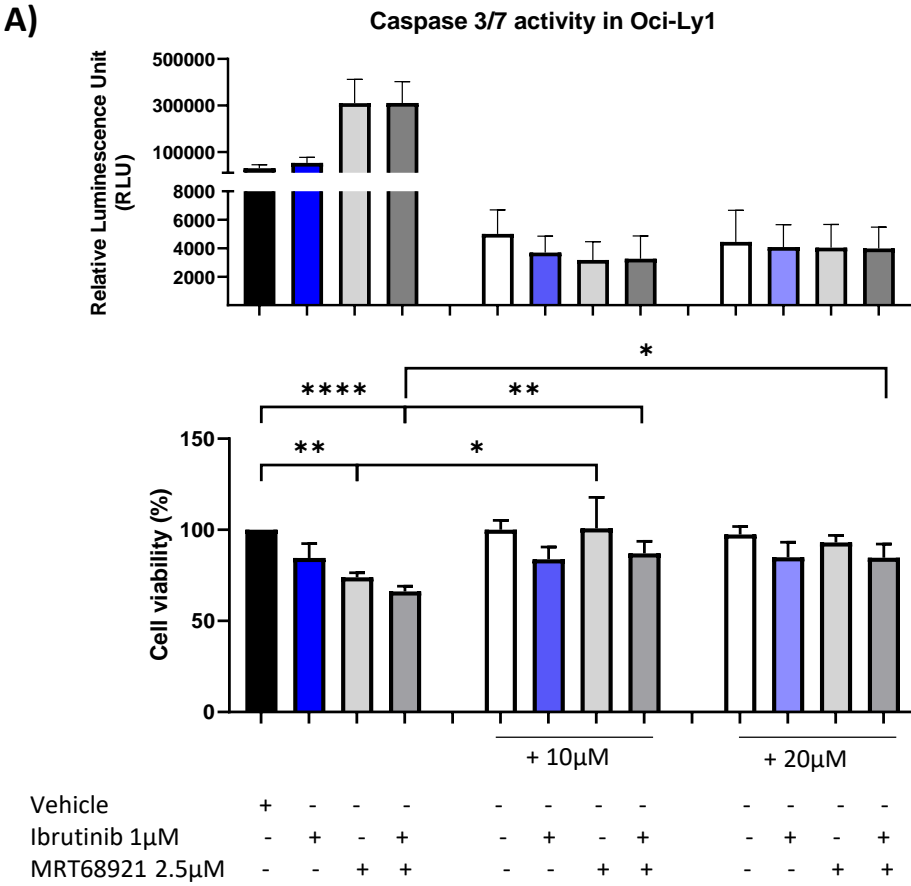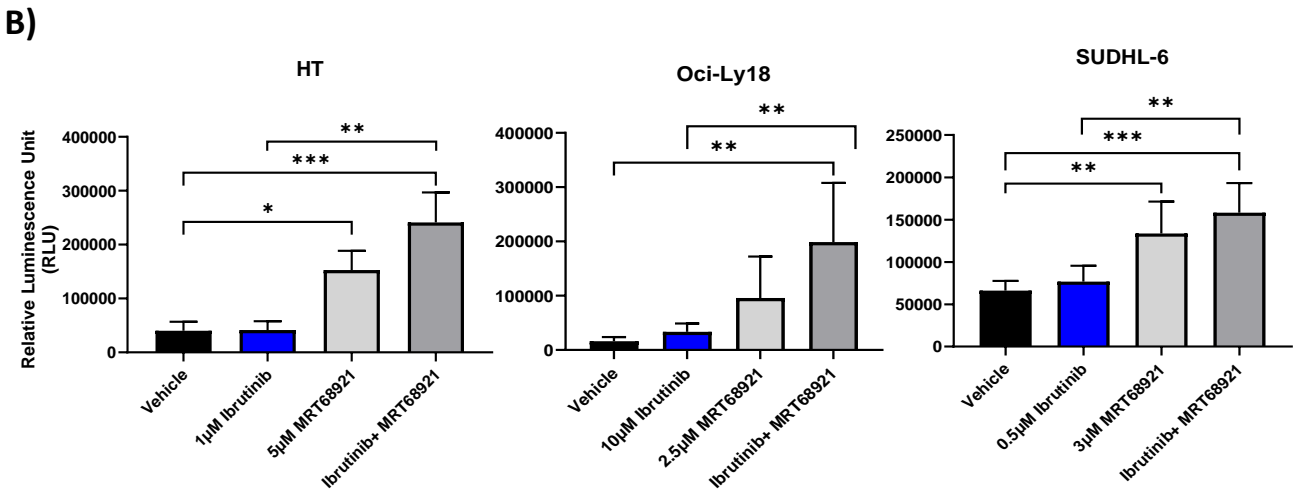

## Supplementary Figure 4

**Supplementary figure 4:** Pan-caspase inhibitor Q-VD-OPh blocked effector caspases 3/7 activity and rescued GCB Oci-Ly1 cells from apoptosis. **A)** GCB Oci-Ly1 cells were pretreated with either 10 or 20µM for 1 h thereafter vehicle, 1µM ibrutinib, 2.5µM MRT68921 and combination was added. Caspase 3/7 activity was measured using luminescence and cell viability was measured at 8 h (three independent experiments were conducted). **B)** GCB HT, Oci-Ly18 and SUDHL-6 cell lines were treated as indicated for 8 h. Caspase 3/7 activity was evaluated. Error bars show the mean  $\pm$  SD, \* $P$ <0.05, \*\* $P$ <0.01, \*\*\* $P$ <0.001, \*\*\*\* $P$ <0.0001

**A)**

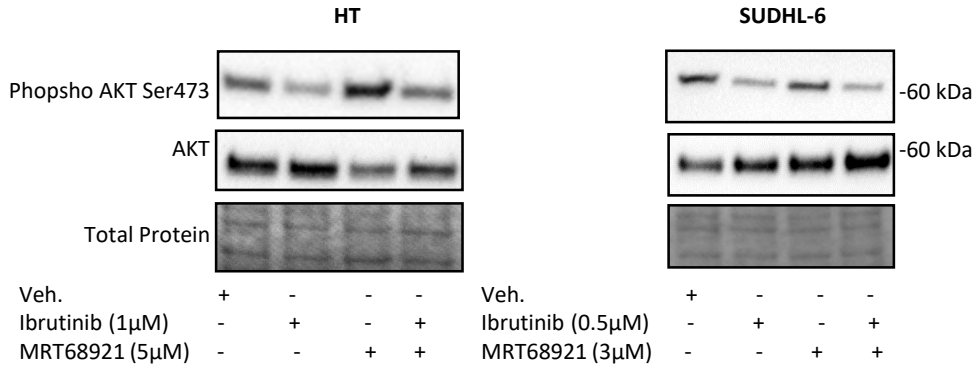

**B)**

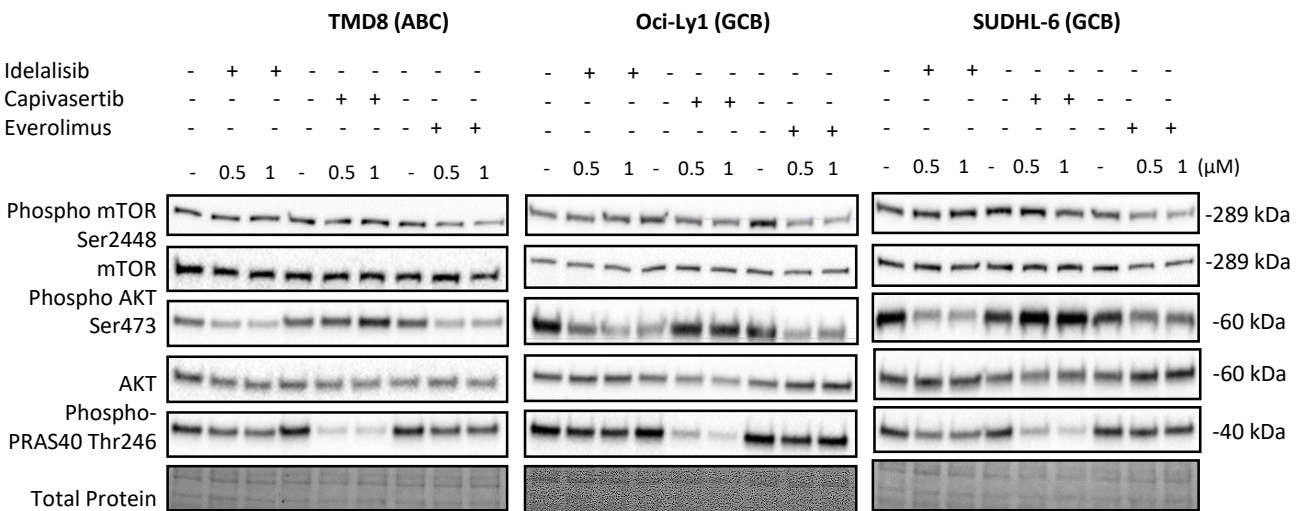

### Supplementary Figure 5

**Supplementary figure 5:** Immunoblotting to assess the phosphorylation of AKT Ser473 and total AKT. Cell lines were treated with vehicle, ibrutinib, MRT68921 and co-treatment (as indicated) for 24 h. Representative blot of three independent experiments. To validate ibrutinib targeted the AKT pathway ABC TMD8 and GCB Oci-Ly1 and SUDHL-6 cell lines were treated with idelalisib (p110 $\alpha$  isoform PI3K inhibitor), capivasertib (pan-AKT kinase ATP-competitive inhibitor) and everolimus (mTORC1 inhibitor) for 4 h (concentrations as indicated). Representative blot indicate that pharmacological inhibitors targeting the PI3K-AKT-mTOR decreased the phosphorylation of active proteins associated to the pathway therefore confirming that ibrutinib is active in dephosphorylating AKT.



A)

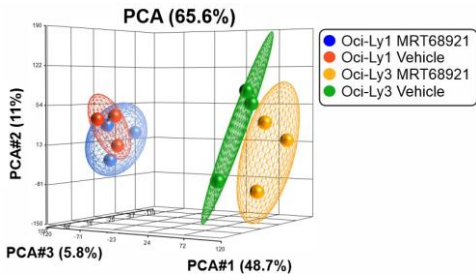

B)

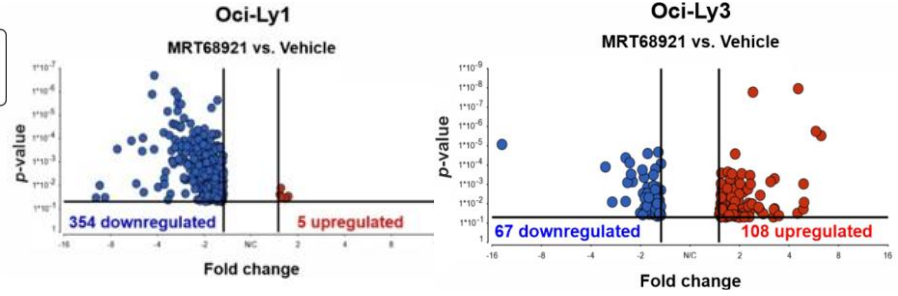

C)

**Downregulated Genes**  
60min MRT68921 vs. Vehicle Oci-Ly3

D)

**Upregulated Genes**  
60min MRT68921 vs. Vehicle Oci-Ly3

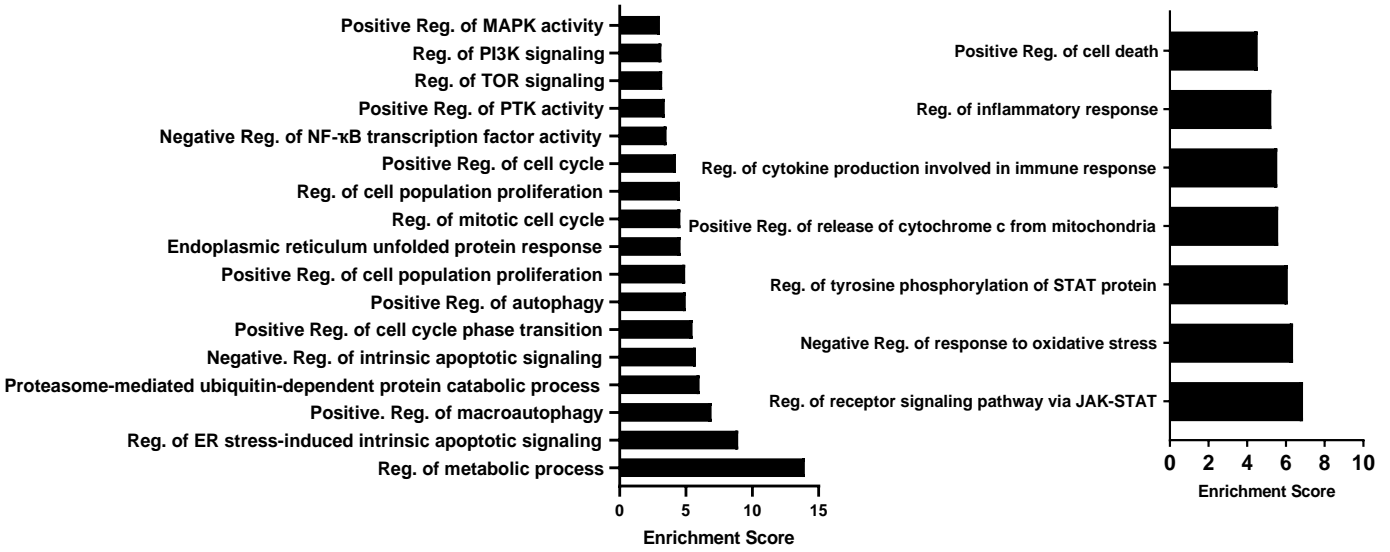

E)

**ABC Oci-Ly3-treated vs. GCB Oci-Ly1-treated**

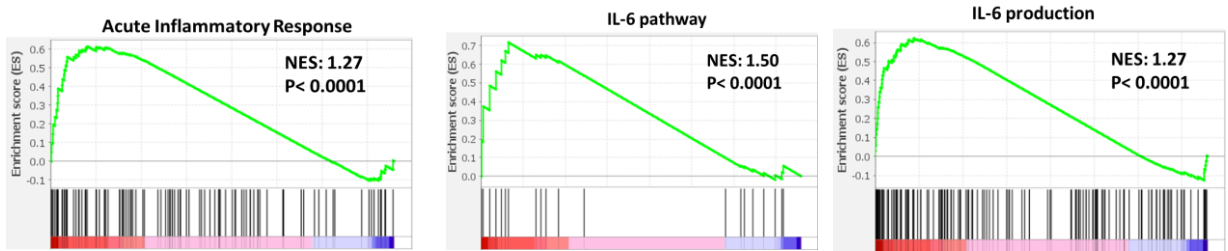

F)

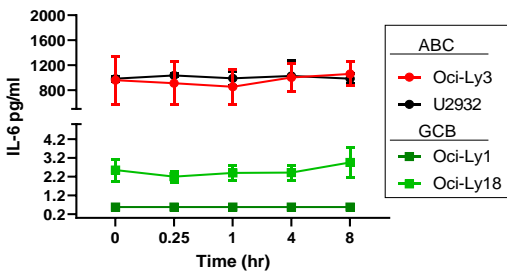

G)

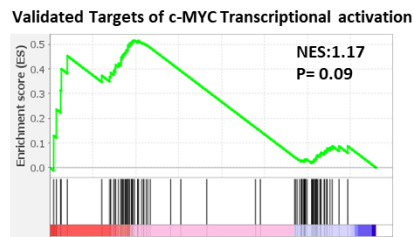

H)

**IL-6/JAK/STAT regulation of MYC model**

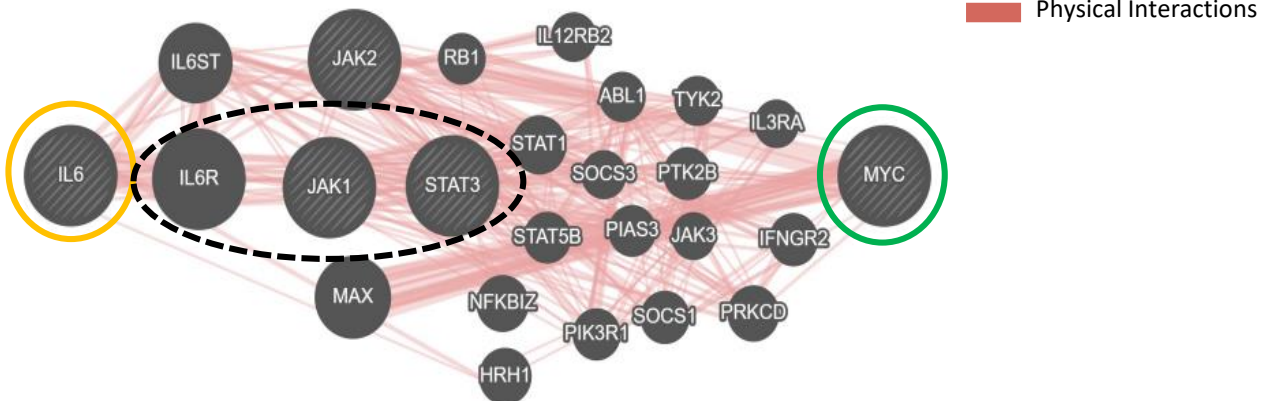

**Supplementary figure 6:** Distinct ULK1 inhibitory pathways in DLBCL subtype cell lines. **A)** Principle component analysis (PCA) mapped to demonstrate the variability of GCB Oci-Ly1 and ABC Oci-Ly3 treated with MRT68921 2.5 $\mu$ M and vehicle for 1 h (three independent experiments). **B)** Volcano plots illustrates the differentially expressed genes of GCB Oci-Ly1 and ABC Oci-Ly3 MRT68921-treated vs. vehicle; y axis: negative log of *P* value, x axis: log<sub>2</sub>-fold change; blue dots represent downregulated genes and red dots upregulated genes. **C)** Gene Ontology (GO) analysis of downregulated genes in ABC Oci-Ly3 (MRT68921-treated vs. vehicle). **D)** GO enrichment of differentially expressed genes upregulated in ABC Oci-Ly3 (MRT68921-treated vs. vehicle). **E)** Gene set enrichment analysis (GSEA) reports distribution of differentially expressed genes through normalised enrichment score (NES) of ABC Oci-Ly3-MRT68921 treated vs. GCB Oci-Ly1-MRT68921. **F)** IL-6 secretion remained significantly higher in ABC cell lines, in contrast to GCB cell lines. ULK1 inhibition did not change the secretion of IL-6 in a time-dependent manner (h). Data shown is a relative cytokine unit (pg/ml), four independent experiments was conducted in Oci-Ly3, Oci-Ly1 and Oci-Ly18 cell lines, U2932 was independently repeated twice. Error bars represent the mean  $\pm$  SD, \*\*\*\**P*<0.0001). **G)** GSEA demonstrating no significant changes in c-MYC transcriptional transcripts in Oci-Ly3 (MRT68921-treated vs. vehicle). **H)** *In silico* assessment of predicted protein-protein interactions between IL-6, JAK1, STAT3 and MYC using GeneMANIA database (<http://genemania.org/>).

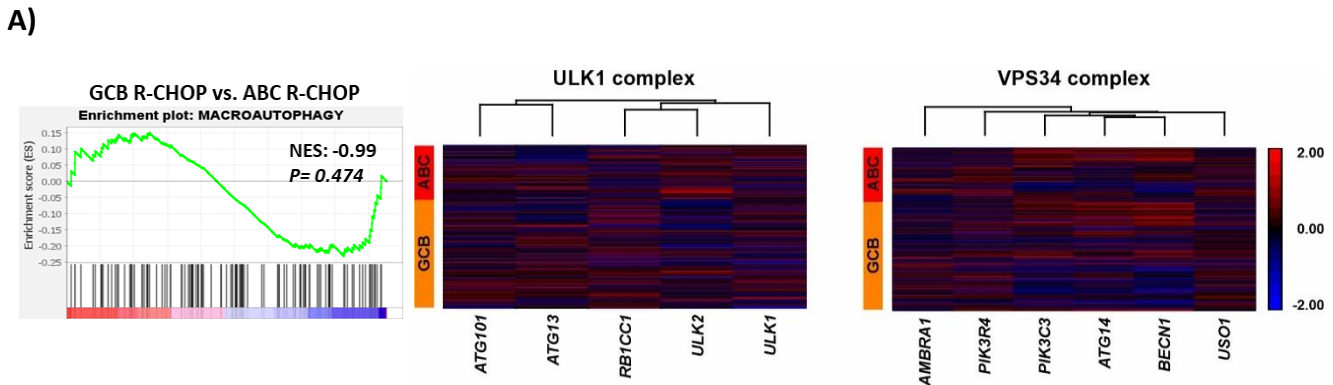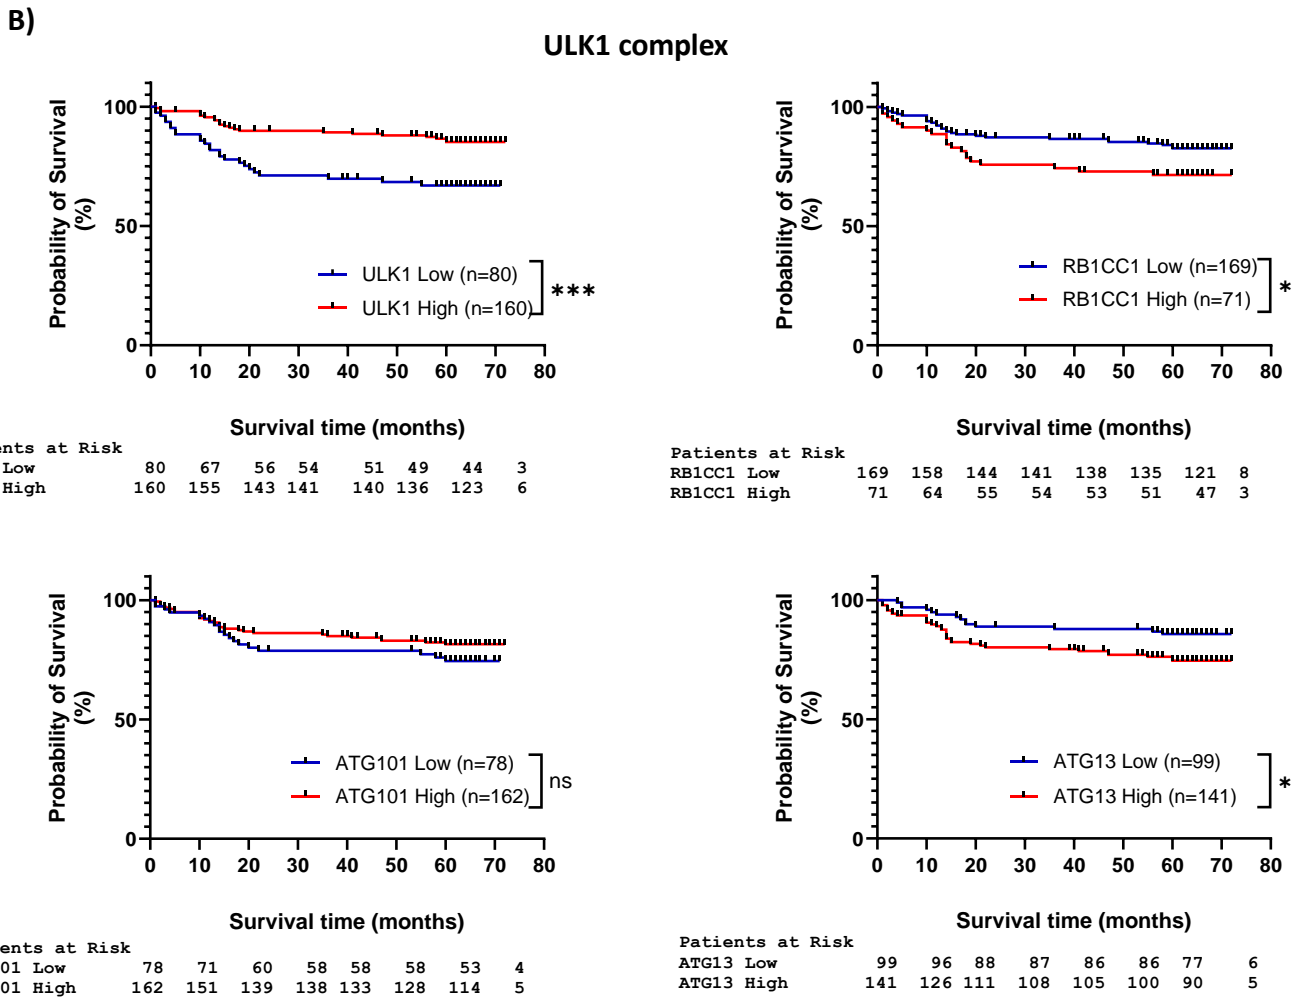

### Supplementary Figure 7

**Supplementary figure 7:** Autophagy initiating ATGs expression in GCB patients and survival outcome relating to R-CHOP. **A)** GSEA compared autophagy transcripts between gene expression profiling (GEP) of GCB (n=240) and ABC (n=121) patients assigned to R-CHOP treatment arm<sup>1</sup>. Heat-maps of differentially expressed genes within ULK1 complex and VPS34 complex in ABC and GCB patients. **B)** Autophagy initiating ATGs expression in GCB patients and survival outcome relating to R-CHOP. Cut-off points for differentially expressed genes of the ULK1 complex was determined using X-tile software<sup>2</sup>. Kaplan-Meier analysis of and log-rank test (mantel-cox) provided statistical significance between gene expression.

## VPS34 complex

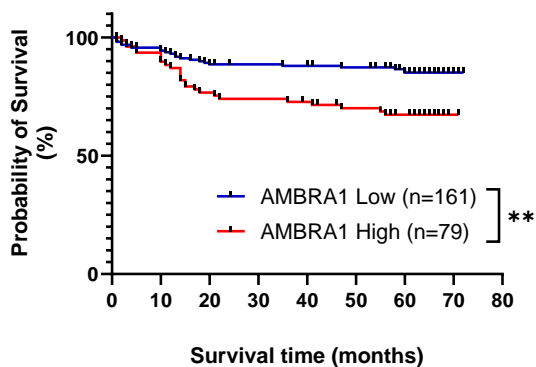

| Patients at Risk |     |     |     |     |     |     |     |   |
|------------------|-----|-----|-----|-----|-----|-----|-----|---|
| AMBRA1 Low       | 161 | 150 | 139 | 137 | 135 | 133 | 120 | 8 |
| AMBRA1 High      | 79  | 72  | 60  | 58  | 56  | 52  | 48  | 2 |

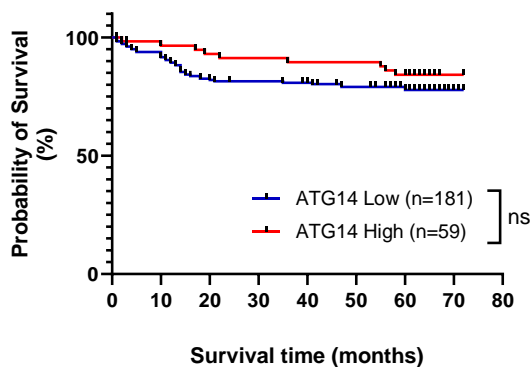

| Patients at Risk |     |     |     |     |     |     |     |   |
|------------------|-----|-----|-----|-----|-----|-----|-----|---|
| ATG14 Low        | 181 | 166 | 145 | 142 | 139 | 134 | 120 | 8 |
| ATG14 High       | 59  | 56  | 54  | 53  | 52  | 52  | 47  | 2 |

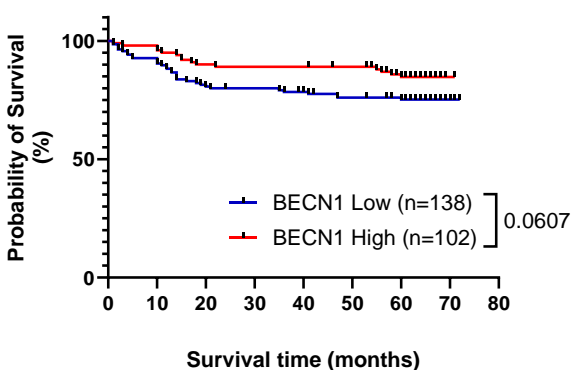

| Patients at Risk |     |     |     |     |     |    |    |   |
|------------------|-----|-----|-----|-----|-----|----|----|---|
| BECN1 Low        | 138 | 124 | 108 | 105 | 101 | 98 | 92 | 8 |
| BECN1 High       | 102 | 98  | 91  | 90  | 90  | 88 | 75 | 2 |

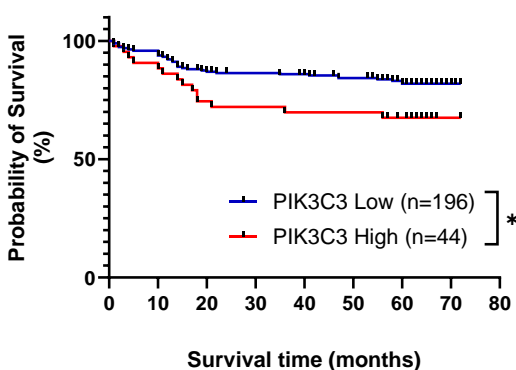

| Patients at Risk |     |     |     |     |     |     |     |   |
|------------------|-----|-----|-----|-----|-----|-----|-----|---|
| PIK3C3 Low       | 196 | 183 | 166 | 163 | 160 | 155 | 140 | 8 |
| PIK3C3 High      | 44  | 39  | 34  | 32  | 31  | 31  | 28  | 4 |

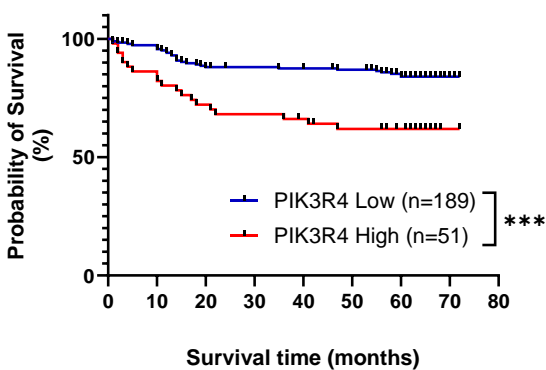

| Patients at Risk |     |     |     |     |     |     |     |   |
|------------------|-----|-----|-----|-----|-----|-----|-----|---|
| PIK3R4 Low       | 189 | 179 | 162 | 160 | 158 | 156 | 142 | 8 |
| PIK3R4 High      | 51  | 43  | 37  | 35  | 33  | 29  | 26  | 2 |

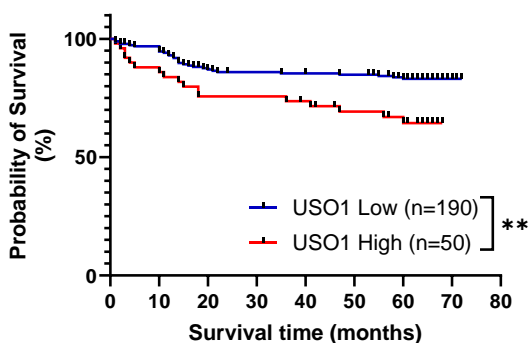

| Patients at Risk |     |     |     |     |     |     |     |   |
|------------------|-----|-----|-----|-----|-----|-----|-----|---|
| USO1 Low         | 190 | 179 | 161 | 157 | 155 | 154 | 140 | 9 |
| USO1 High        | 50  | 43  | 39  | 39  | 36  | 31  | 27  | 2 |

## Supplementary Figure 8

**Supplementary figure 8:** VPS34 gene expression in GCB patients and survival outcome relating to R-CHOP. Gene expression profiles of GCB patients (n=240)<sup>1</sup>, as mentioned (supplementary Figure 7B). Cut-off points for differentially expressed genes from the VPS34 complex was determined using X-tile software<sup>2</sup>. Kaplan-Meier analysis of and log-rank test (mantel-cox) provided statistical significance between gene expression for survival outcome.

| Autophagy initiating complex | Gene comparison   | Gene 1 | Gene 2 | Gene overlap | p value  | Transformed p value (-Log10) |
|------------------------------|-------------------|--------|--------|--------------|----------|------------------------------|
| ULK1 complex                 | ULK1 vs. ATG13    | 160    | 141    | 96           | 1.7E-175 | 174.8                        |
|                              | ATG13 vs. RB1CC1  | 141    | 71     | 32           | 2.3E-49  | 48.6                         |
|                              | RB1CC1 vs. ULK1   | 71     | 160    | 46           | 8.2E-79  | 78.1                         |
| VPS34 complex                | PIK3C3 vs. AMBRA1 | 44     | 79     | 24           | 1.5E-46  | 45.8                         |
|                              | AMBRA1 vs. USO1   | 79     | 50     | 16           | 2.3E-26  | 25.6                         |
|                              | USO1 vs. PIK3R4   | 50     | 51     | 7            | 1.0E-10  | 10.0                         |
|                              | PIK3R4 vs. PIK3R4 | 44     | 51     | 20           | 3.9E-41  | 40.4                         |
|                              | PIK3C3 vs. USO1   | 44     | 50     | 8            | 3.8E-13  | 12.4                         |
|                              | AMBRA1 vs. PIK3R4 | 79     | 51     | 29           | 3.3E-57  | 56.5                         |

## Supplementary Figure 9

**Supplementary figure 9:** ULK1 complex is dominantly expressed in GCB patients and correlates with inferior survival outcome relating to R-CHOP treatment. **A)** Probability of identifying overlapping genes was calculated by comparing two independent genes and within the intersection. Statistical analysis was calculated using [http://nemates.org/MA/progs/overlap\\_stats.html](http://nemates.org/MA/progs/overlap_stats.html).

## Supplementary References

1. Davies A, Cummin TE, Barrans S, Maishman T, Mamot C, Novak U, *et al.* Gene-expression profiling of bortezomib added to standard chemoimmunotherapy for diffuse large B-cell lymphoma (REMoDL-B): an open-label, randomised, phase 3 trial. *Lancet Oncol* 2019 May; **20**(5): 649-662.
2. Camp RL, Dolled-Filhart M, Rimm DL. X-tile: a new bio-informatics tool for biomarker assessment and outcome-based cut-point optimization. *Clin Cancer Res* 2004 Nov 1; **10**(21): 7252-7259.
